# Supplementary material
Source: Springer Nature journal article supplement (https://www.springermedizin.de/resource/supplementary/12885_2013_4232_MOESM2_ESM.pdf/9465826)

Figure S1

*ARHI* (1p31.3)

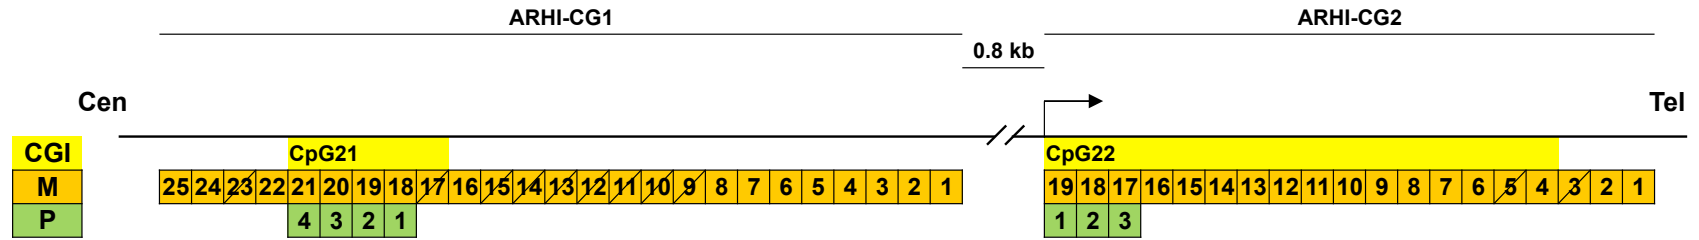

MALDI-TOF MS

Pyrosequencing

ARHI-CG1

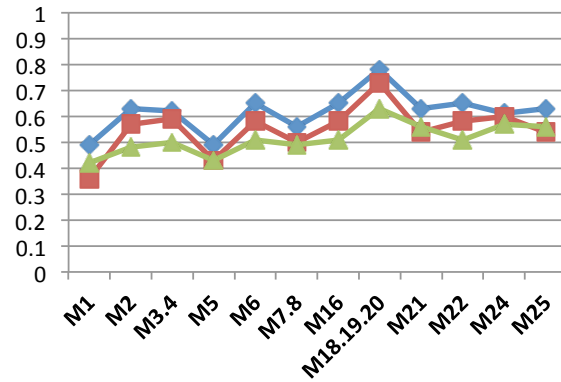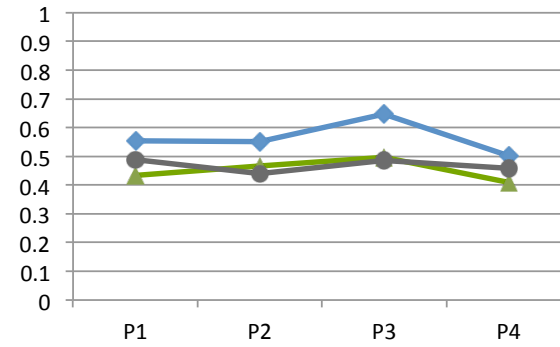

ARHI-CG2

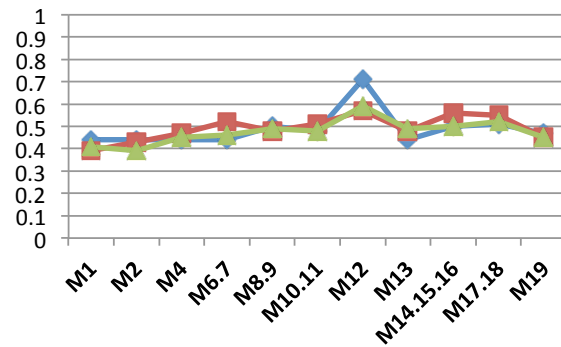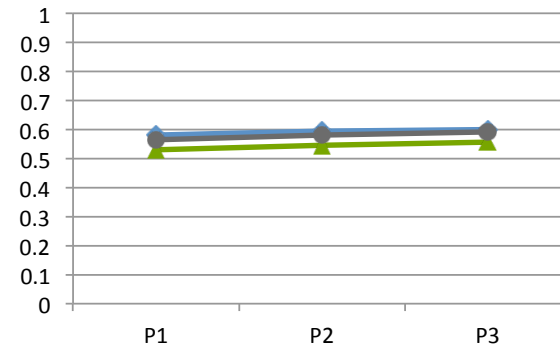

# TP73 (1p36.32)

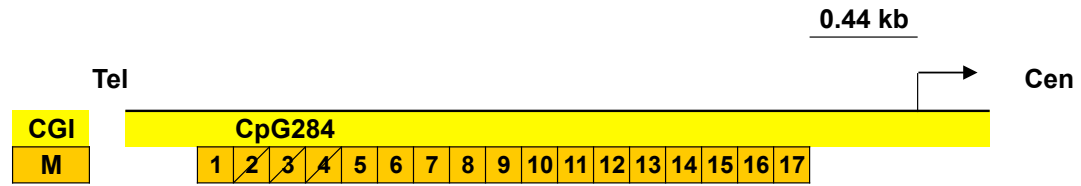

## MALDI-TOF MS

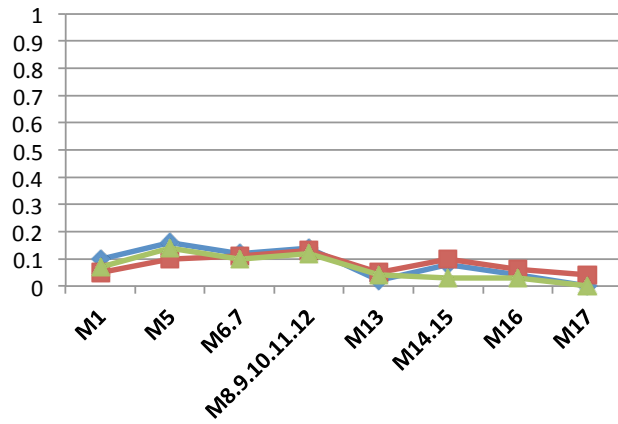

## Pyrosequencing

NA

**SPTBN1 (2p16.2)**

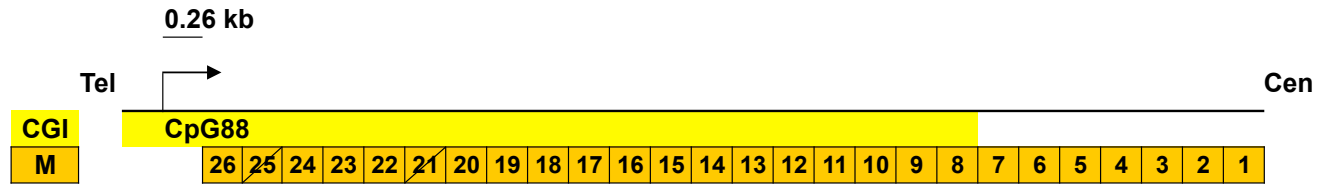

**MALDI-TOF MS**

**Pyrosequencing**

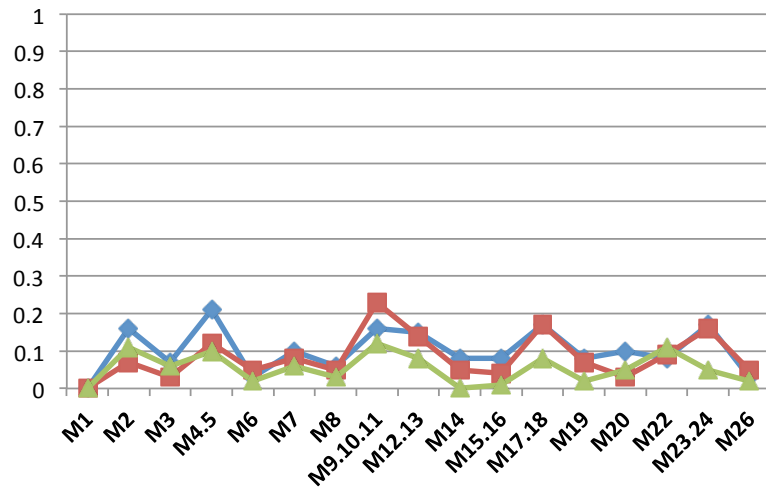

NA

# ZDBF2 (2q33.3)

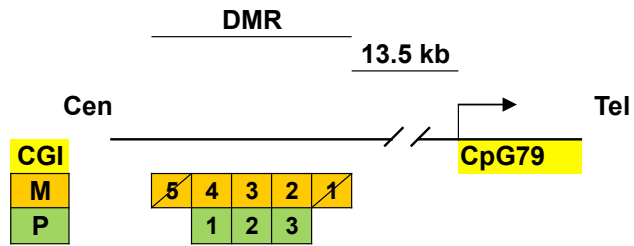

## MALDI-TOF MS

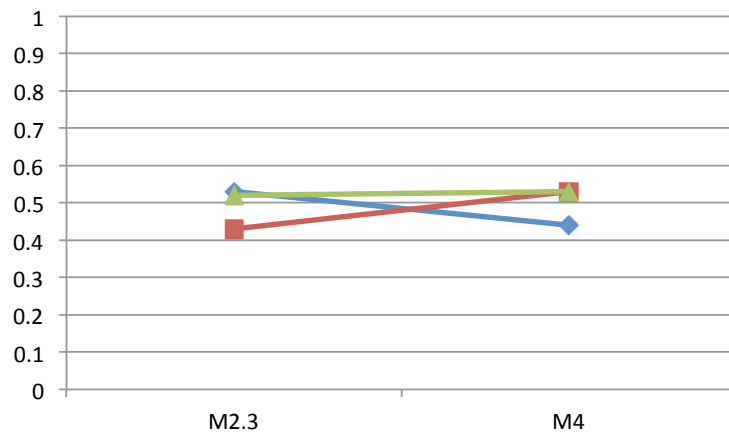

## Pyrosequencing

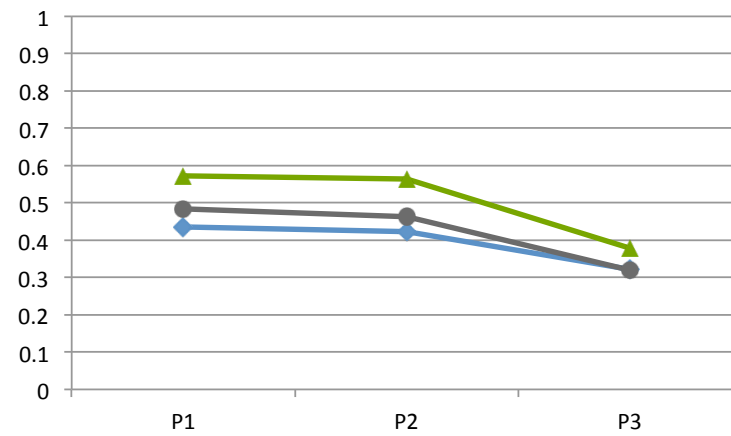

# NAP1L5 (4q22.1)

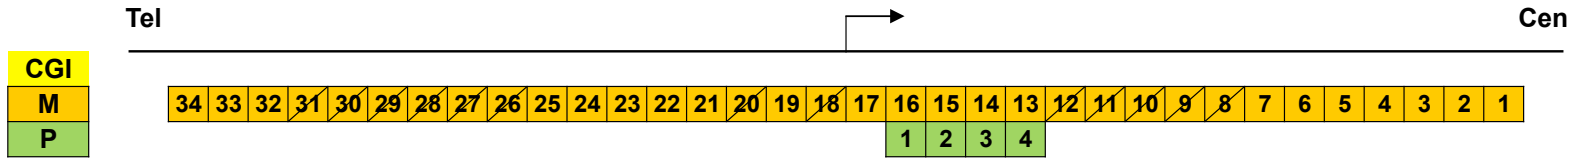

## MALDI-TOF MS

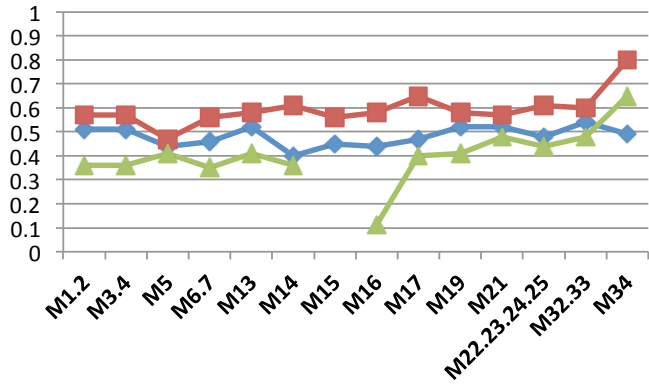

## Pyrosequencing

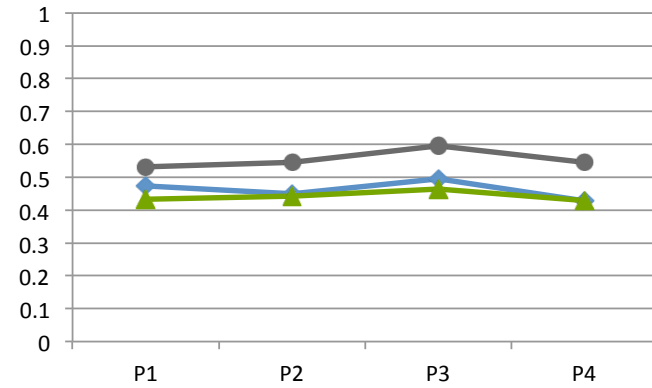

ZAC (6q24.2)

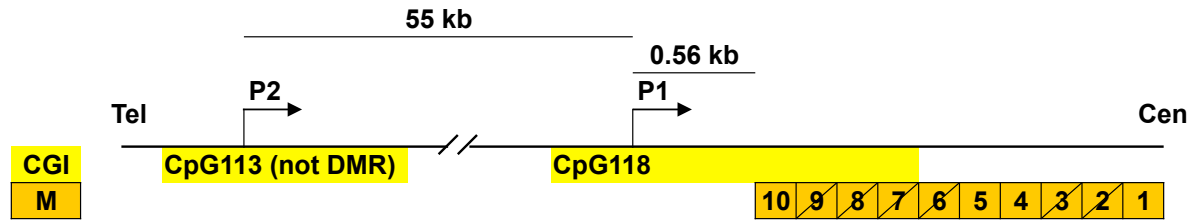

MALDI-TOF MS

Pyrosequencing

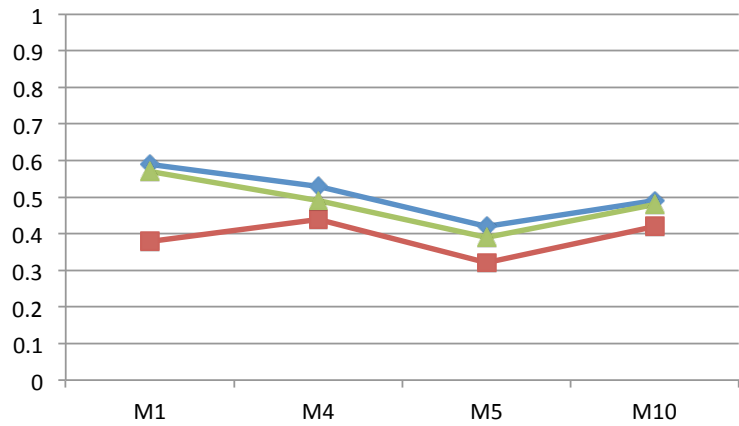

NA

# IGF2R-DMR2 (6q25.3)

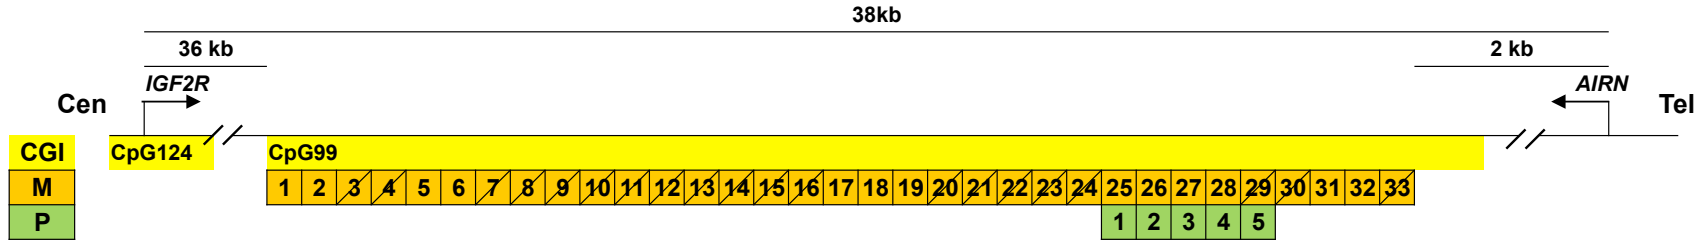

## MALDI-TOF MS

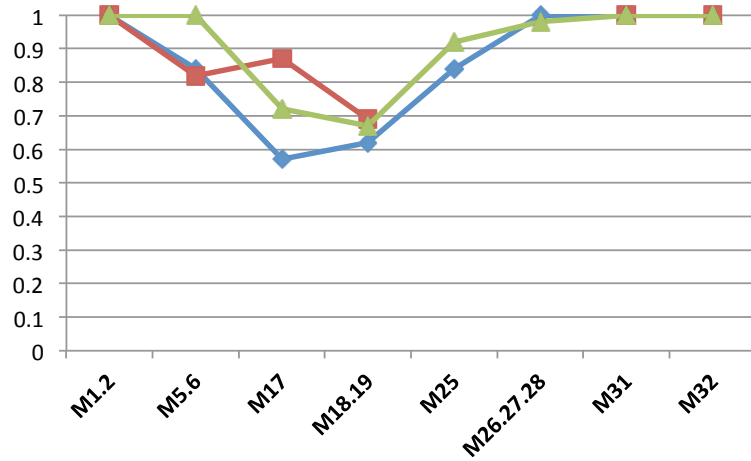

## Pyrosequencing

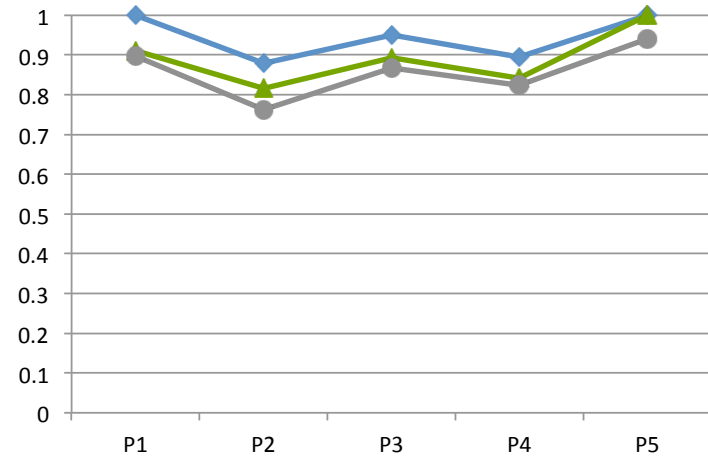

# PEG10 (7q21.3)

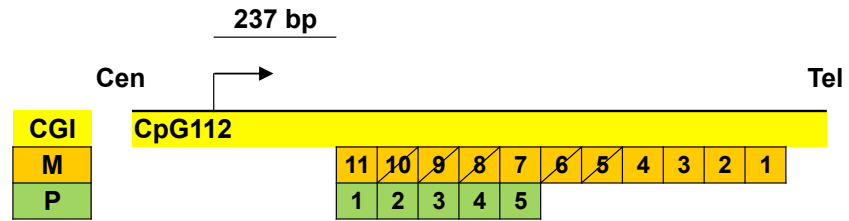

## MALDI-TOF MS

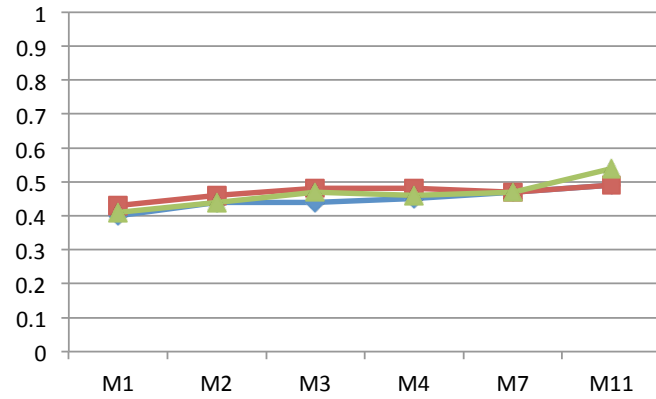

## Pyrosequencing

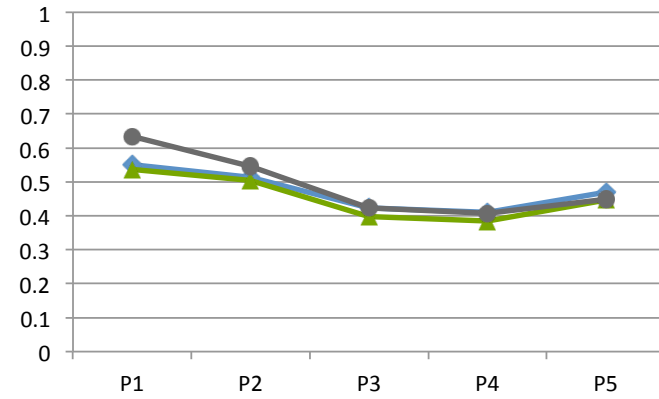



# MEST (7q32.2)

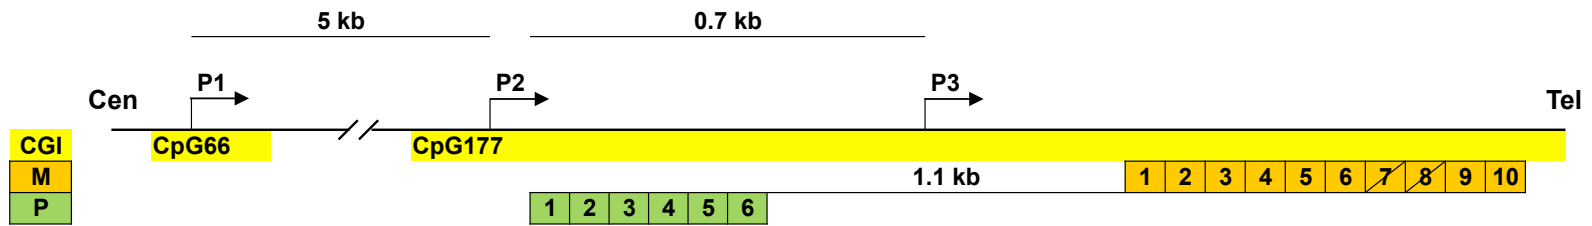

## MALDI-TOF MS

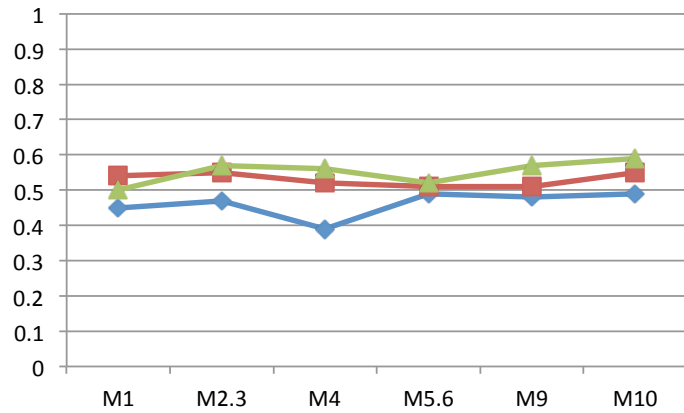

## Pyrosequencing

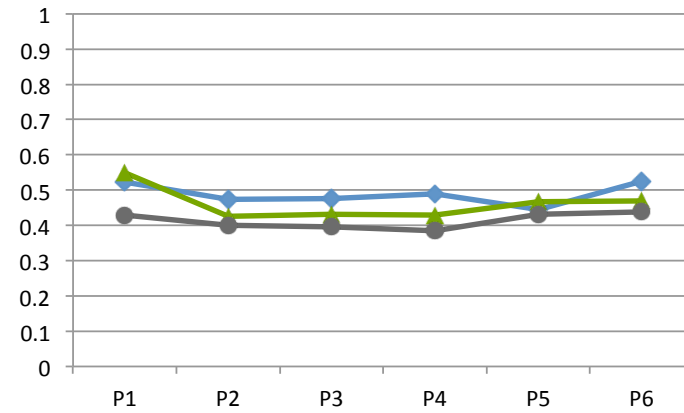

# INPP5Fv2 (10q26.11)

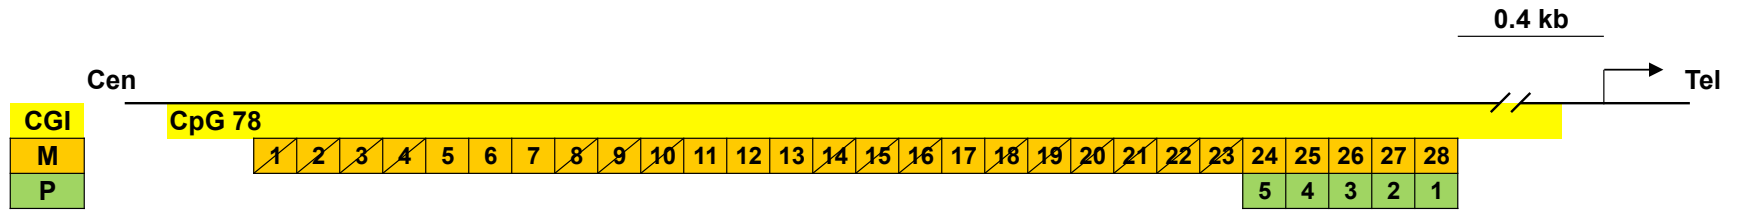

### MALDI-TOF MS

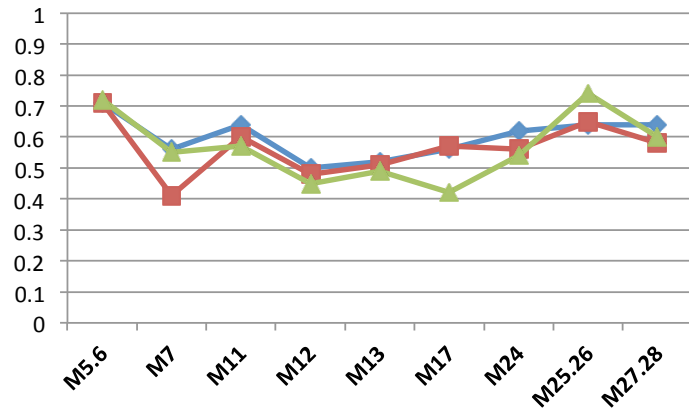

### Pyrosequencing

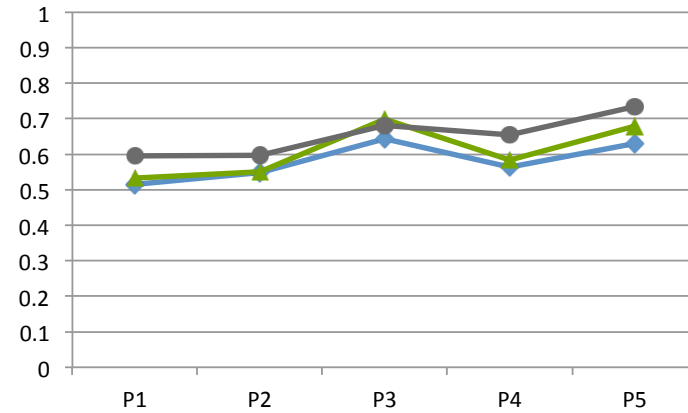

# H19 (11p15.5)

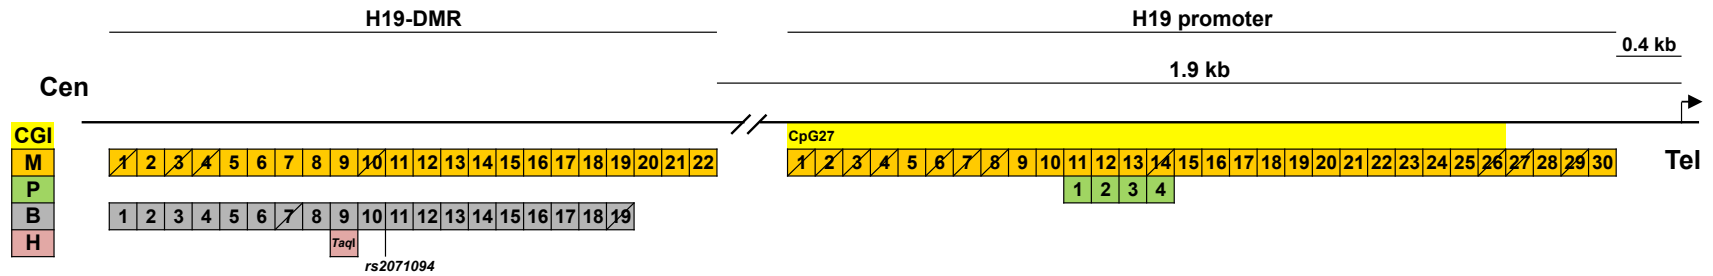

## MALDI-TOF MS

H19-DMR

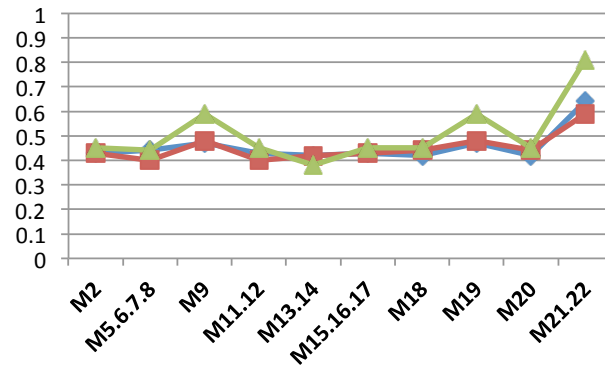

H19 promoter

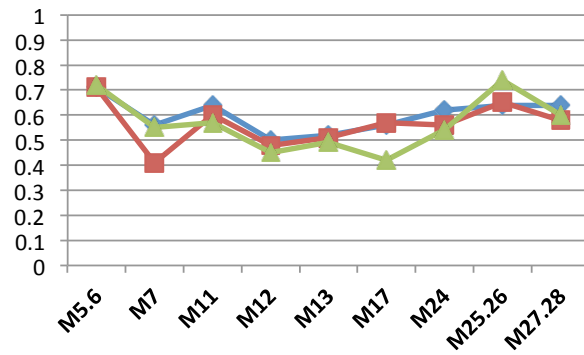

## Pyrosequencing

NA

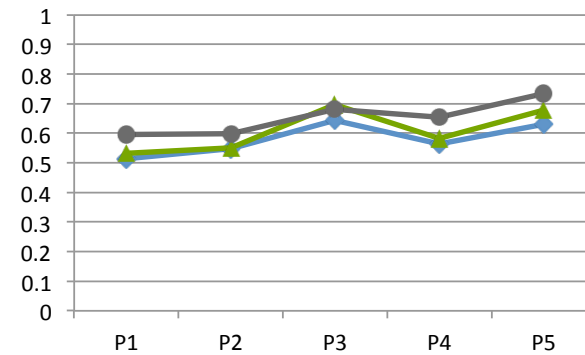

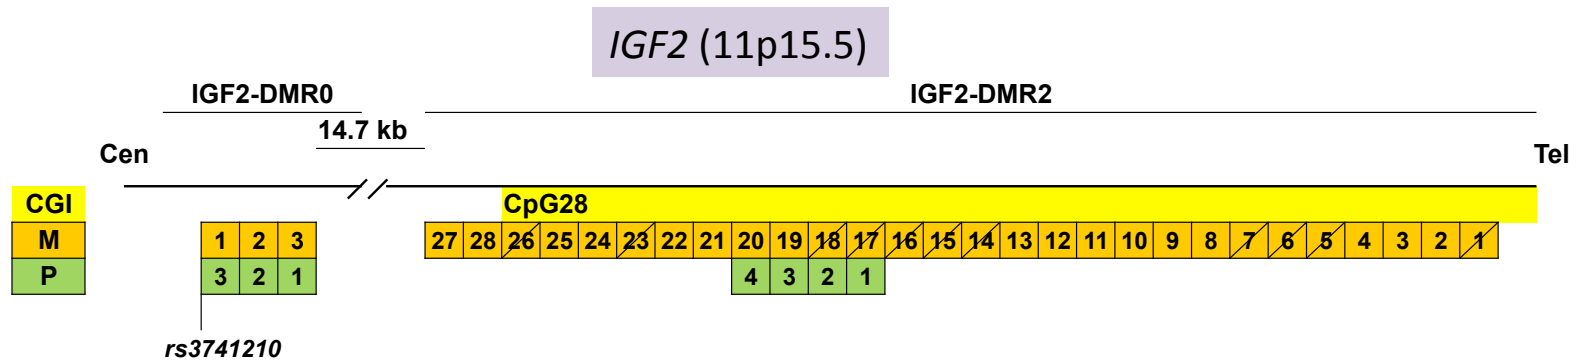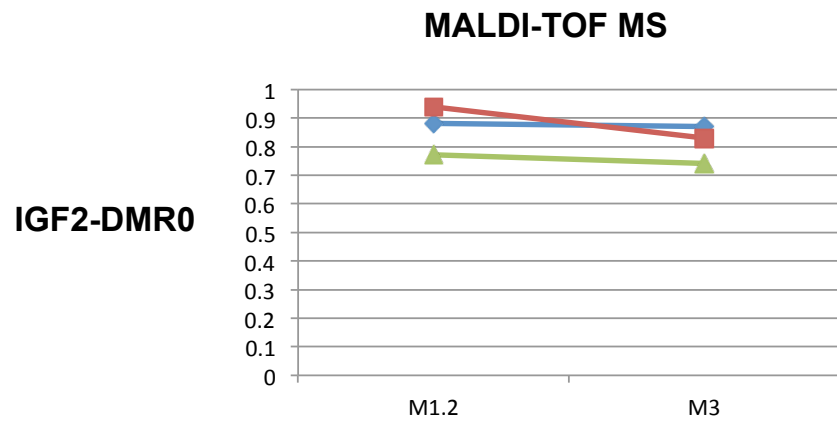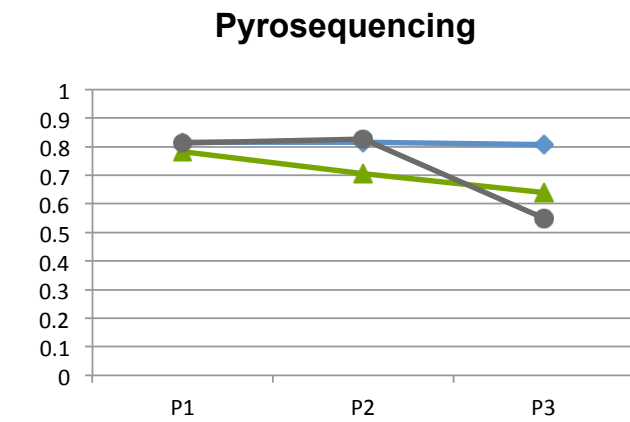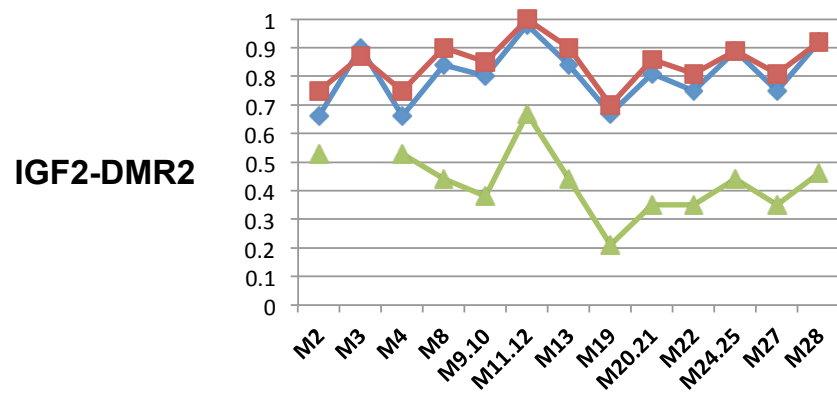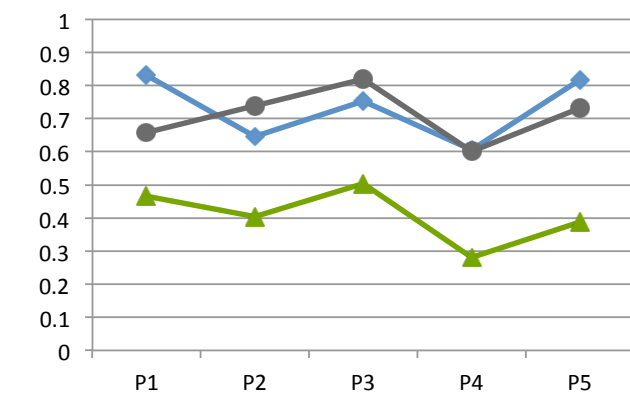

# KvDMR1 (11p15.5)

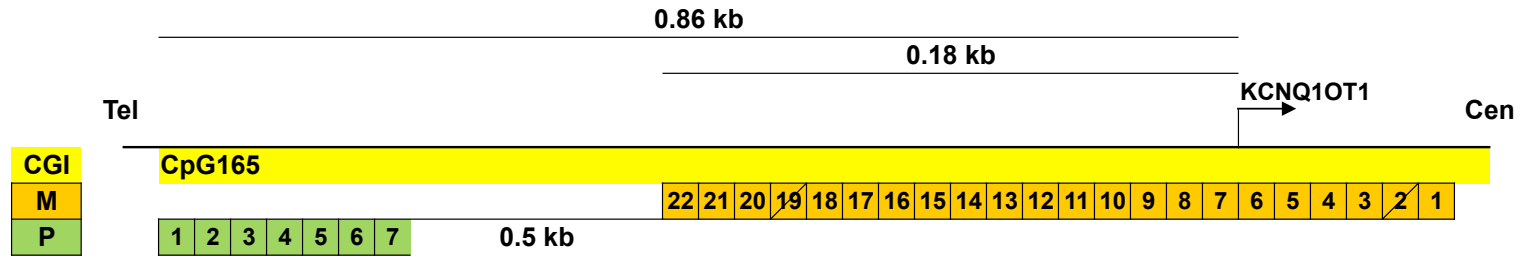

### MALDI-TOF MS

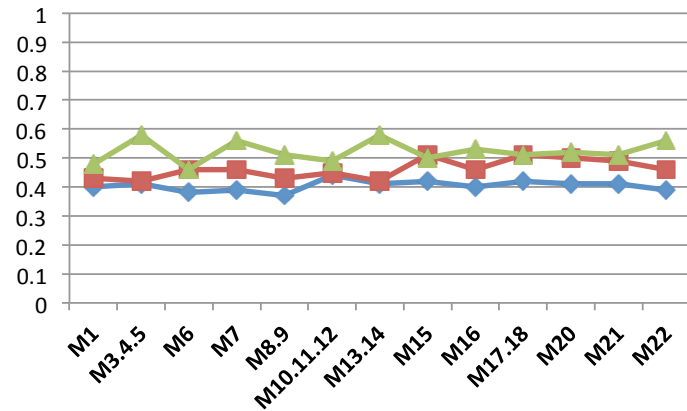

### Pyrosequencing

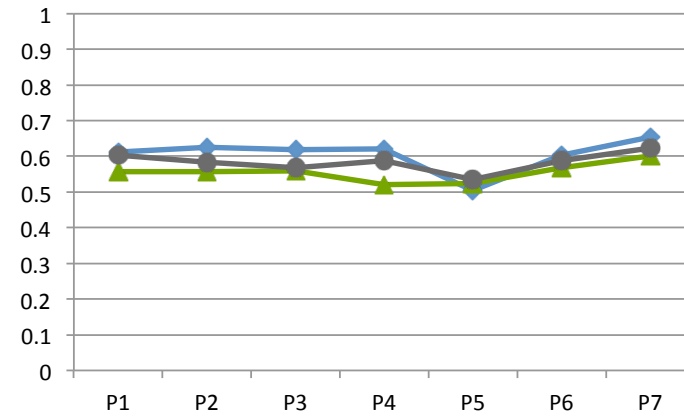

# WT1-AS (11p13)

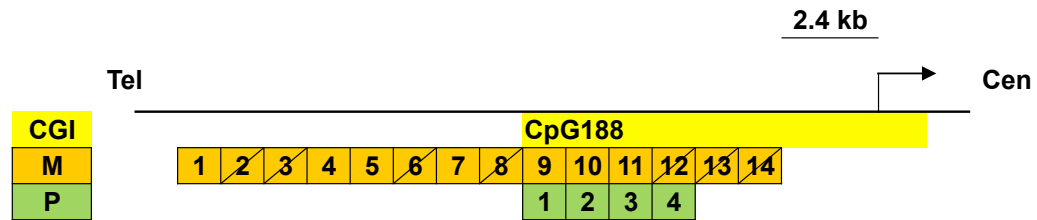

## MALDI-TOF MS

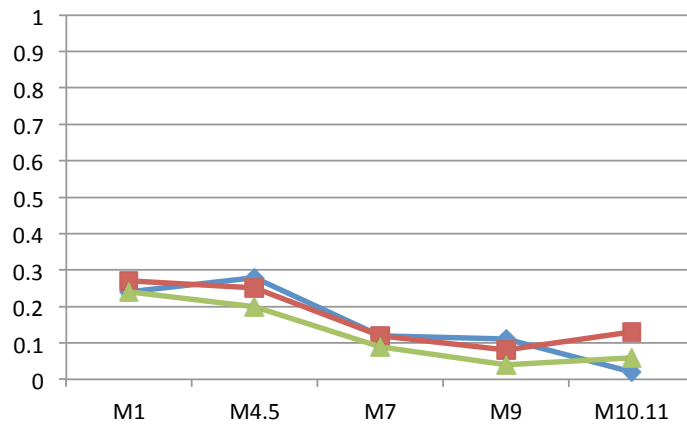

## Pyrosequencing

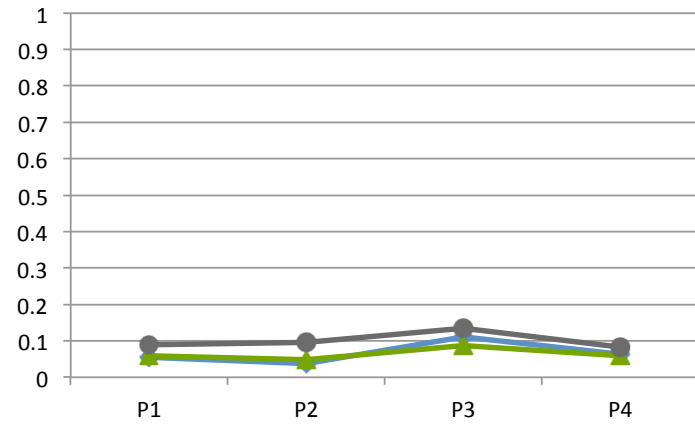

# RB1 (13q14.2)

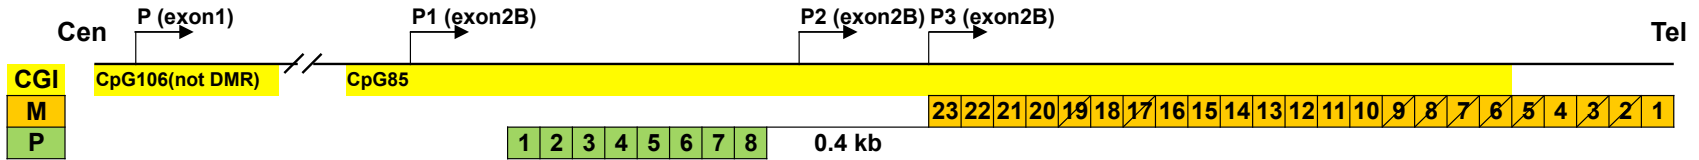

**MALDI-TOF MS**

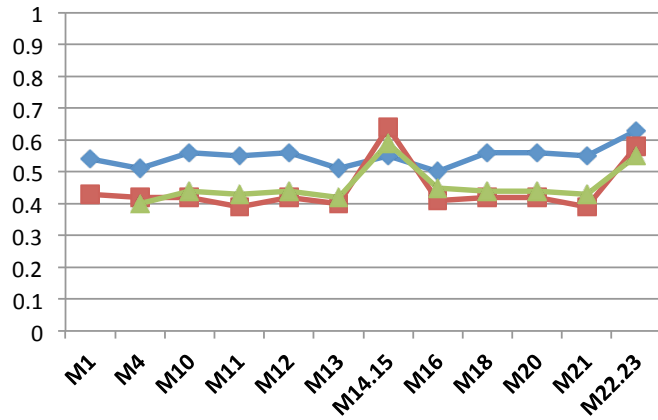

**Pyrosequencing**

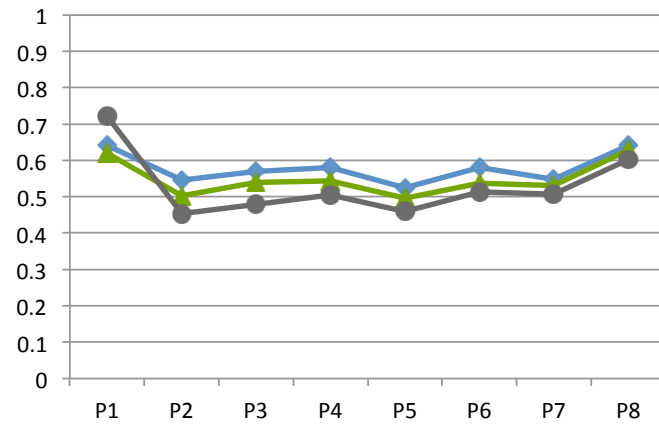

# DLK1 (14q32.2)

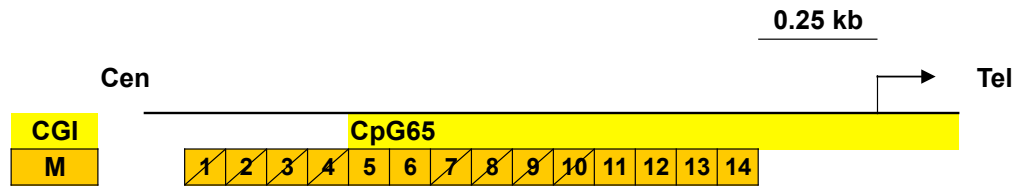

## MALDI-TOF MS

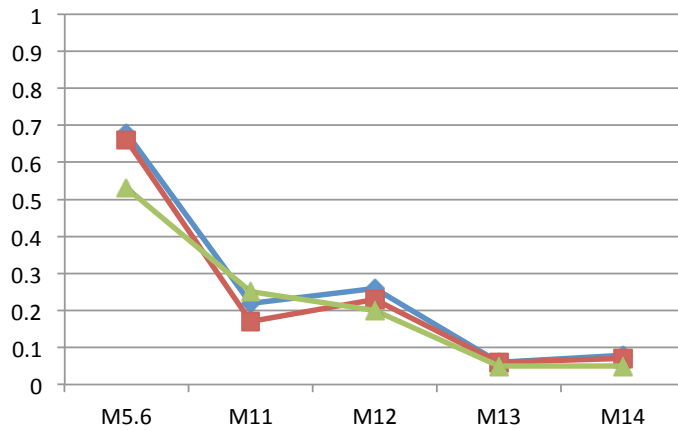

## Pyrosequencing

NA



# IG-DMR (14q32.2)

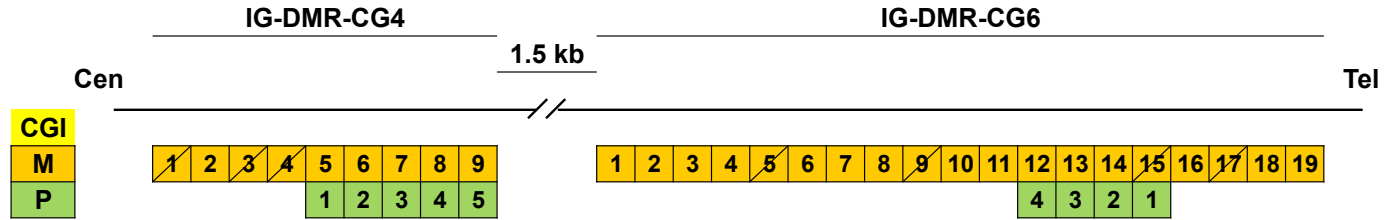

## MALDI-TOF MS

## Pyrosequencing

IG-DMR  
CG4

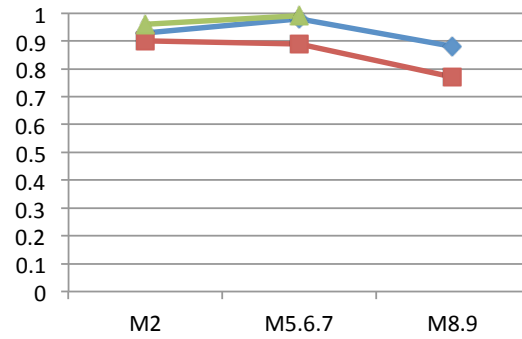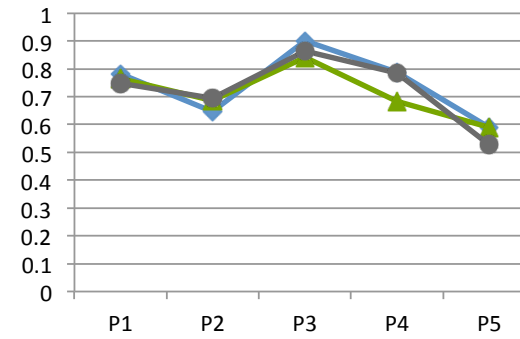

IG-DMR  
CG6

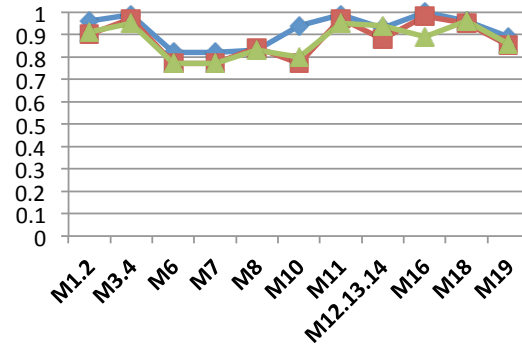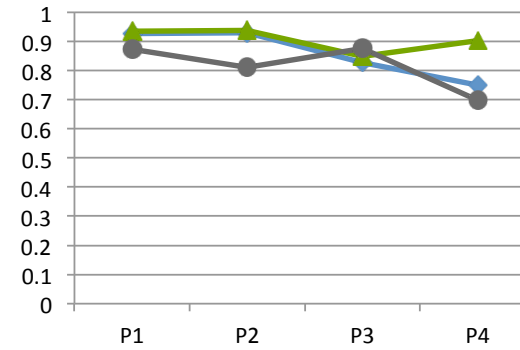

# MEG3-CG7 (14q32.2)

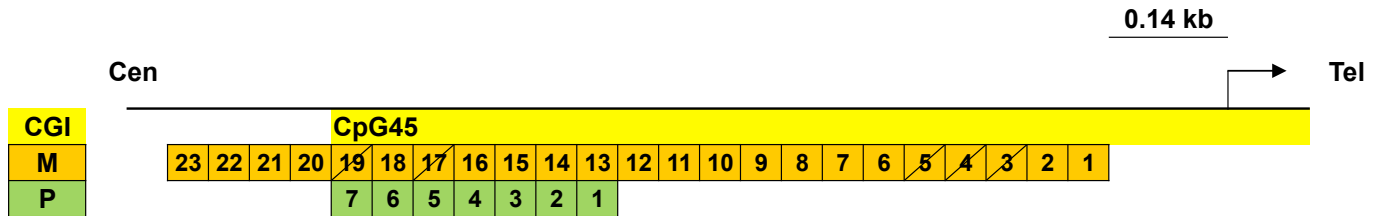

**MALDI-TOF MS**

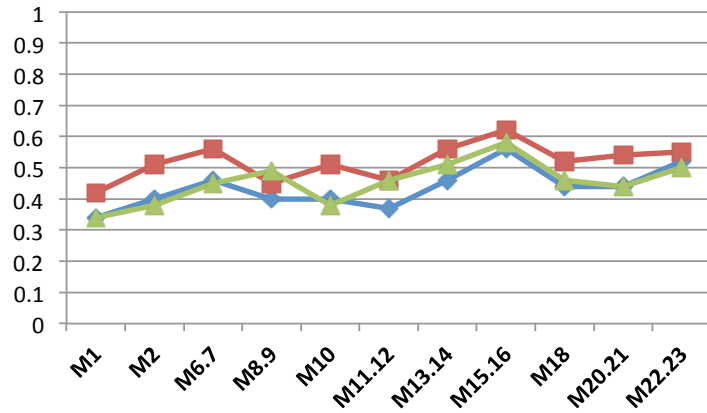

**Pyrosequencing**

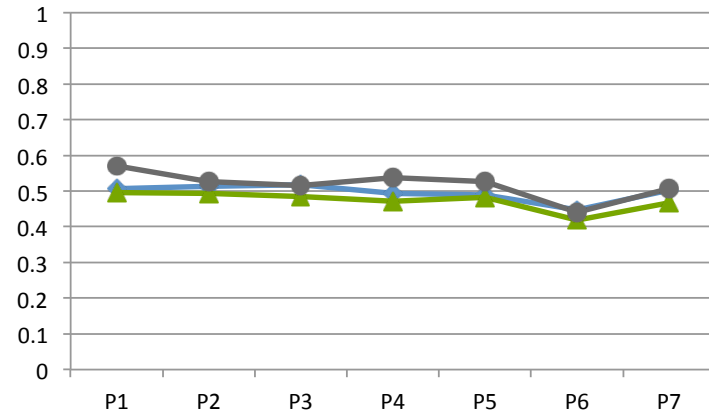

# SNRPN (15q11.2)

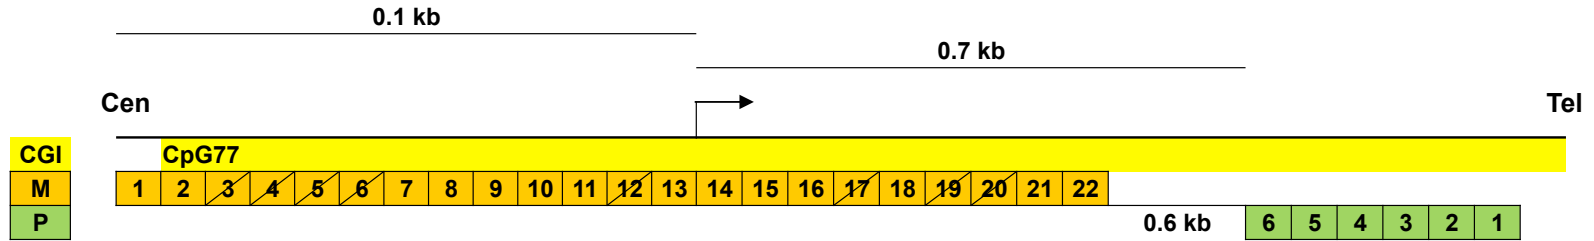

## MALDI-TOF MS

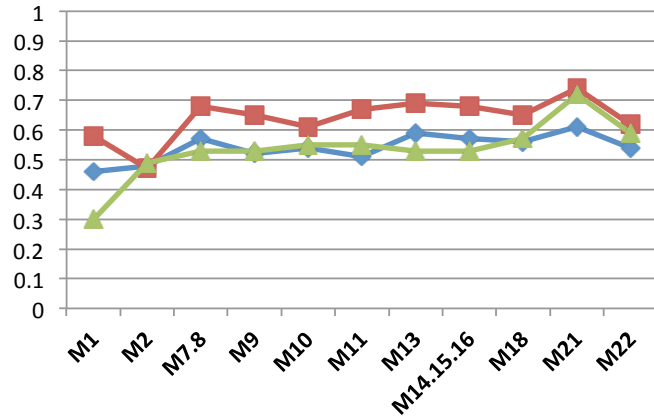

## Pyrosequencing

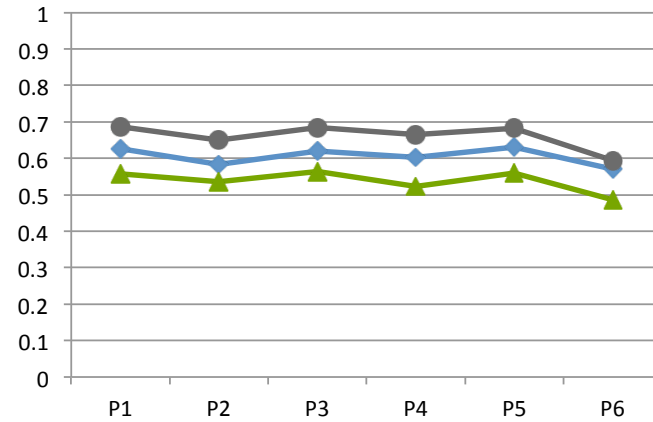

# TCEB3C (18q21.1)

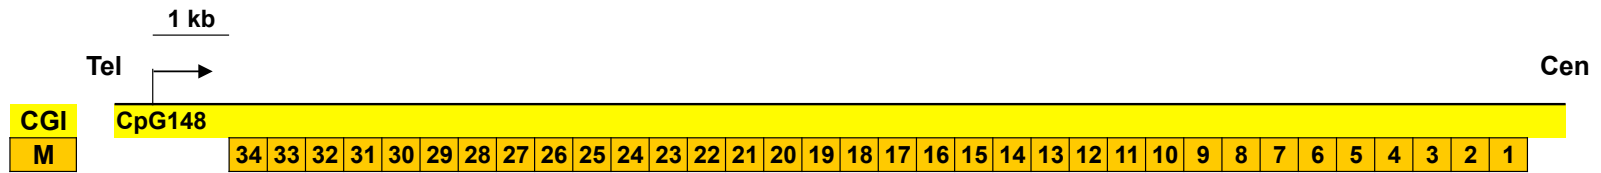

## MALDI-TOF MS

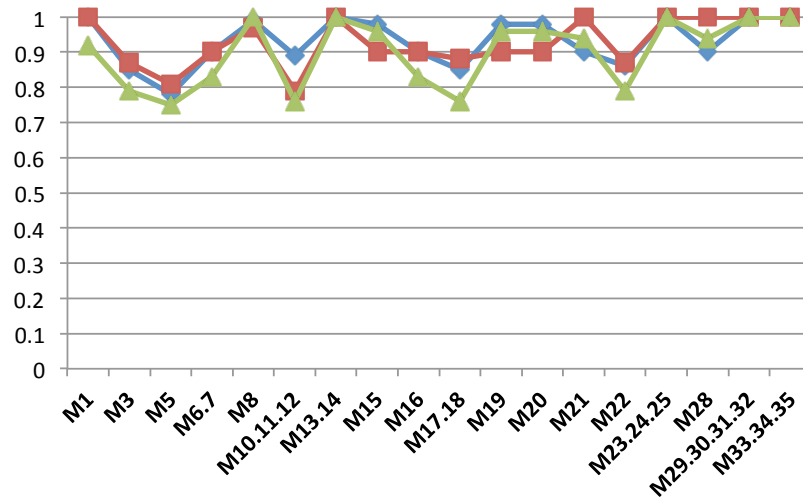

## Pyrosequencing

NA



**USP29 (19q13.43)**

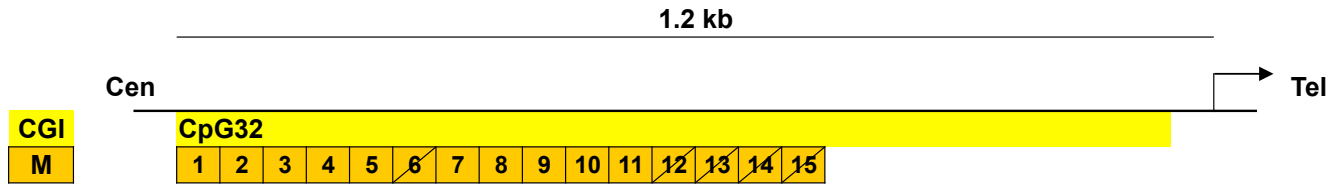

**MALDI-TOF MS**

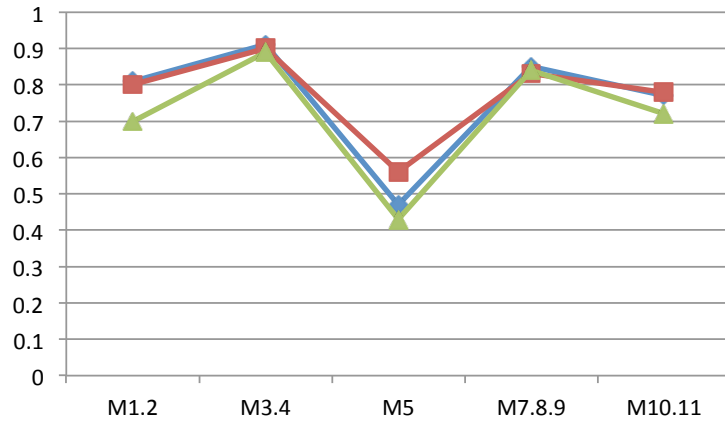

**Pyrosequencing**

NA

# MCTS2 (20q11.21)

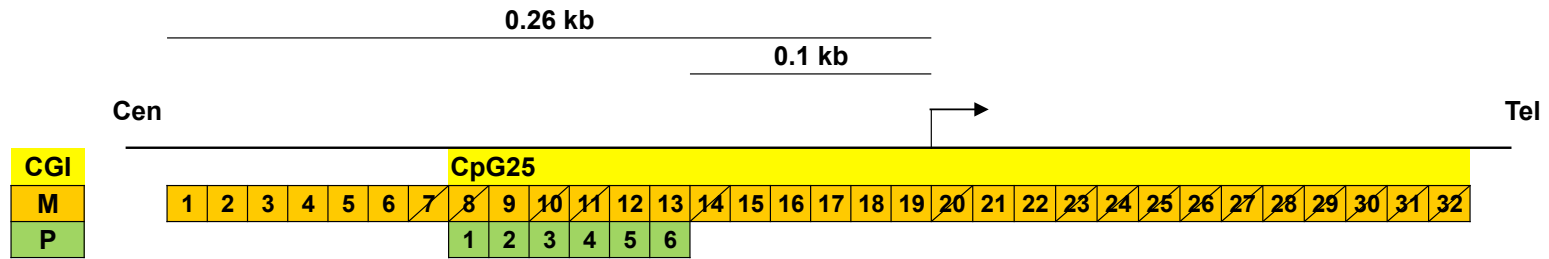

## MALDI-TOF MS

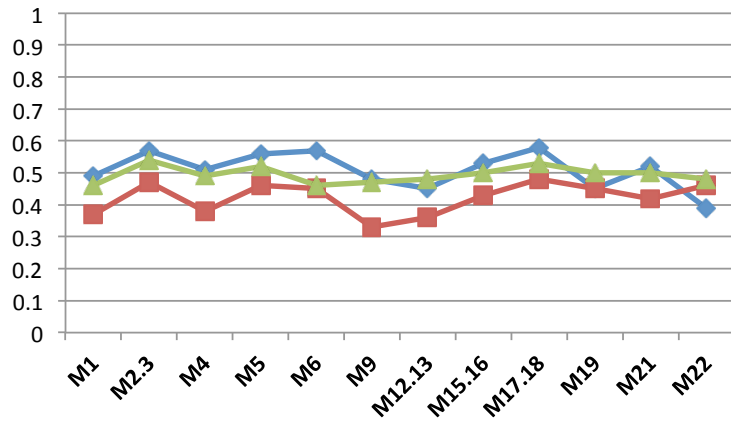

## Pyrosequencing

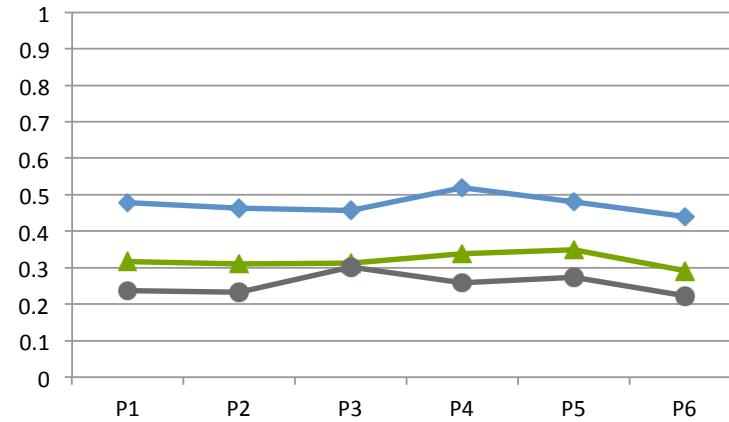

# NNAT (20q11.23)

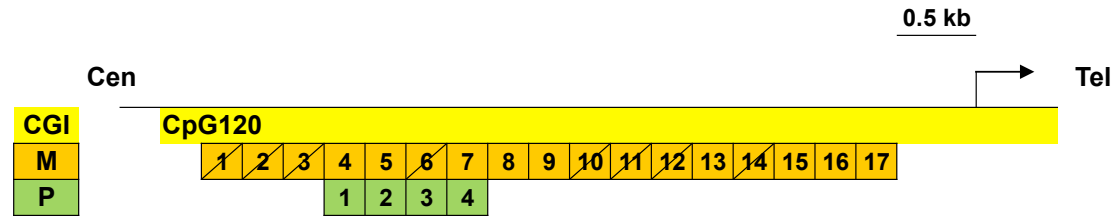

## MALDI-TOF MS

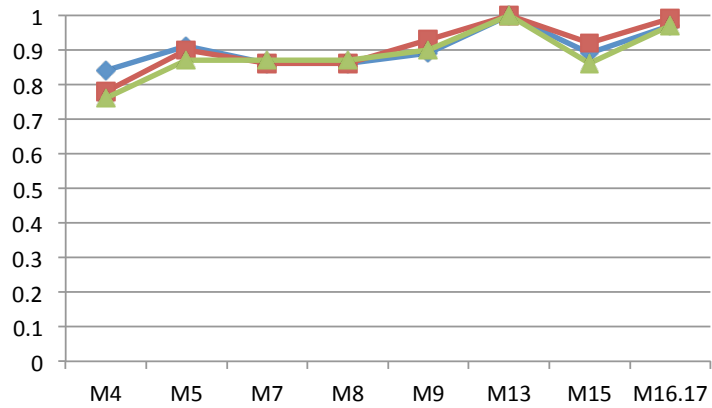

## Pyrosequencing

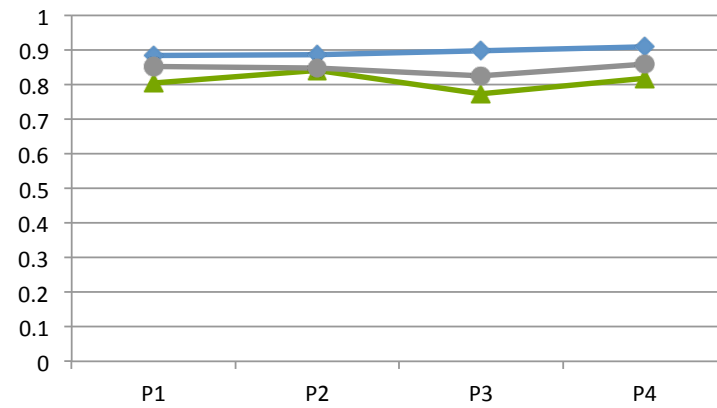



# L3MBTL (20q13.12)

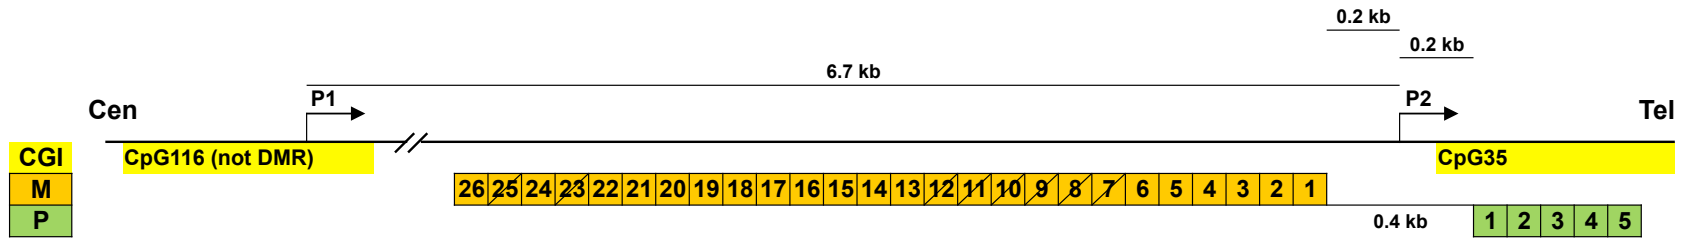

## MALDI-TOF MS

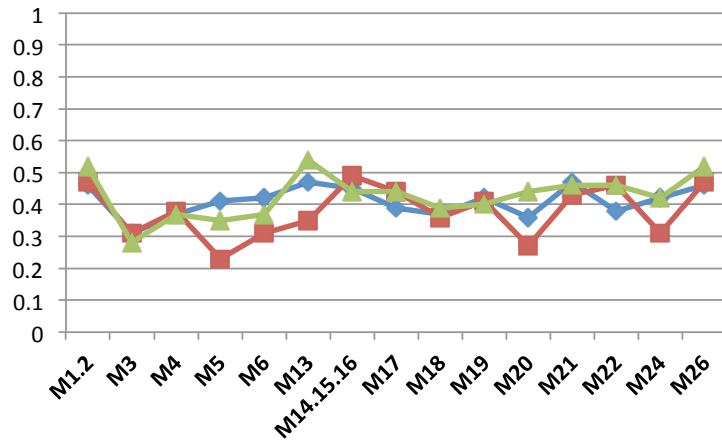

## Pyrosequencing

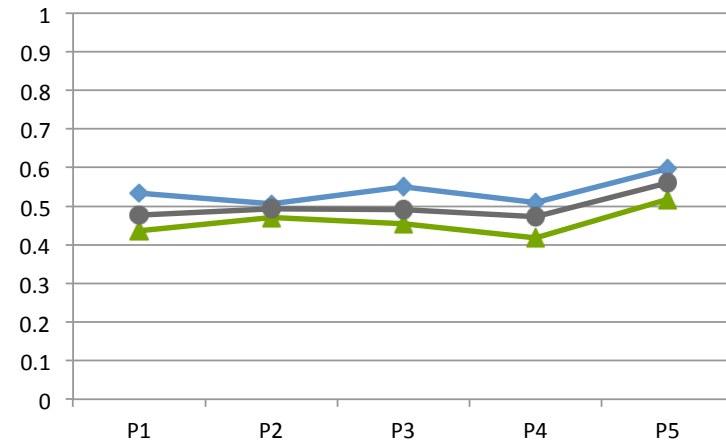

# NESP (20q13.32)

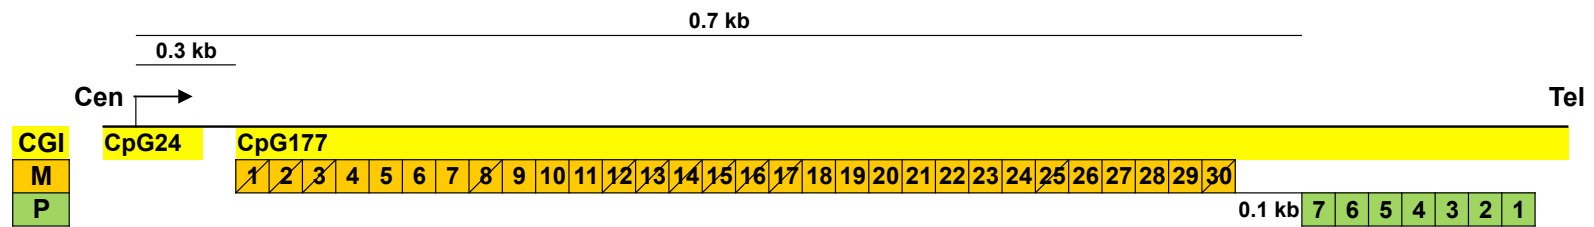

## MALDI-TOF MS

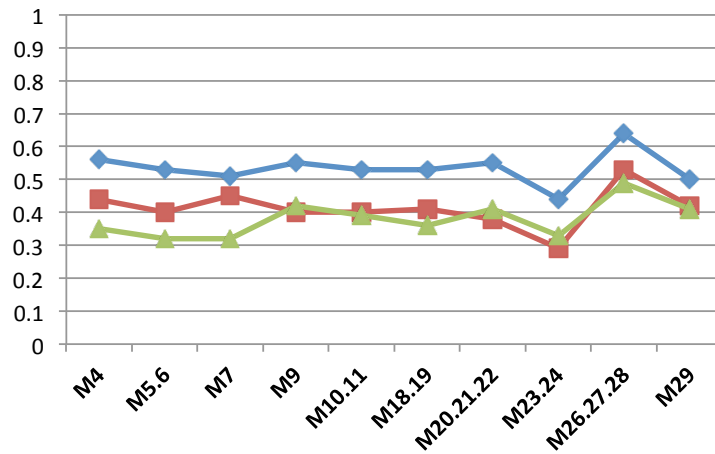

## Pyrosequencing

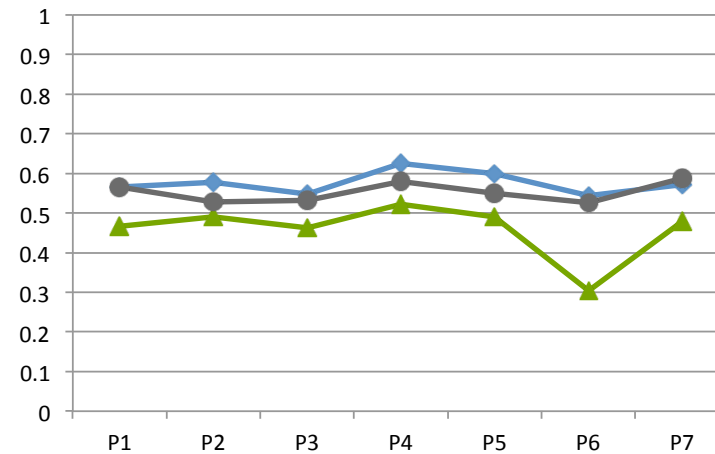

# NESPAS and GNASXL (20q13.32)

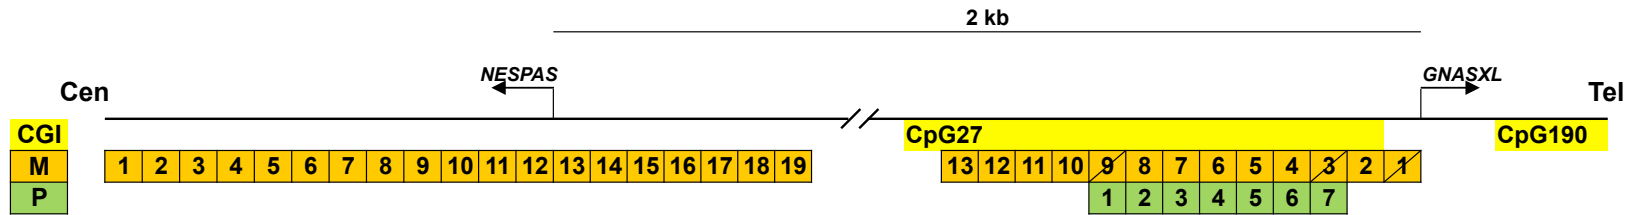

**MALDI-TOF MS**

**Pyrosequencing**

**NESPAS**

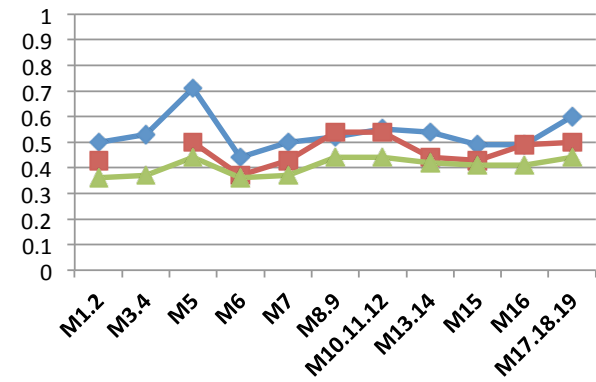

NA

**GNASXL**

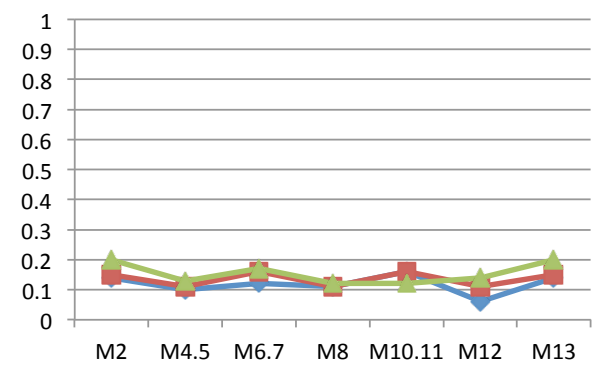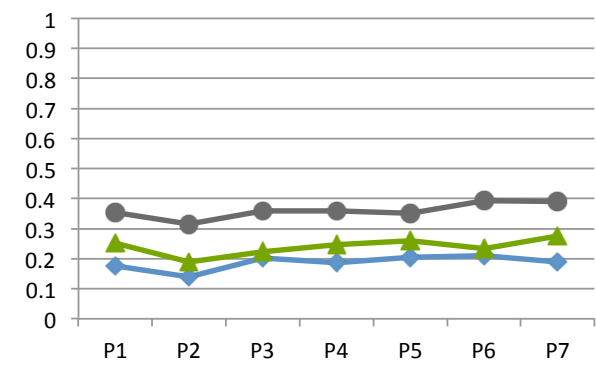

# GNAS1A (20q13.32)

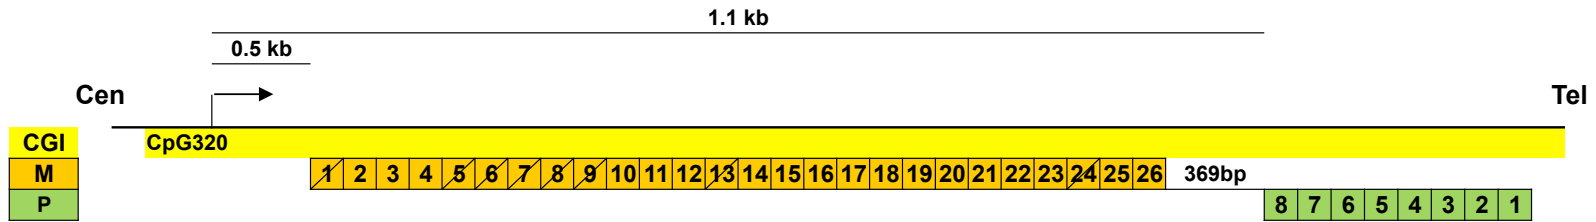

## MALDI-TOF MS

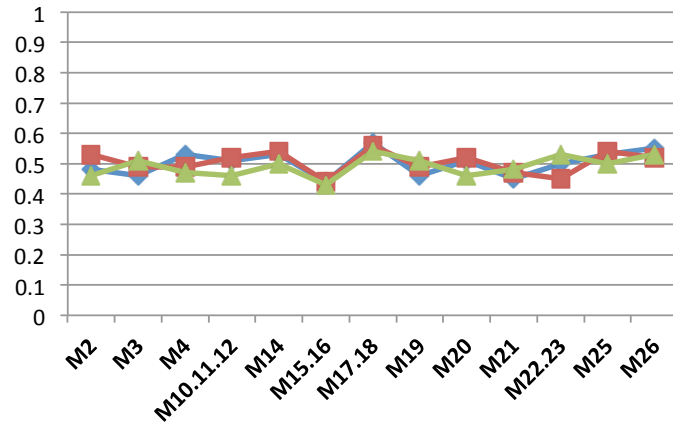

## Pyrosequencing

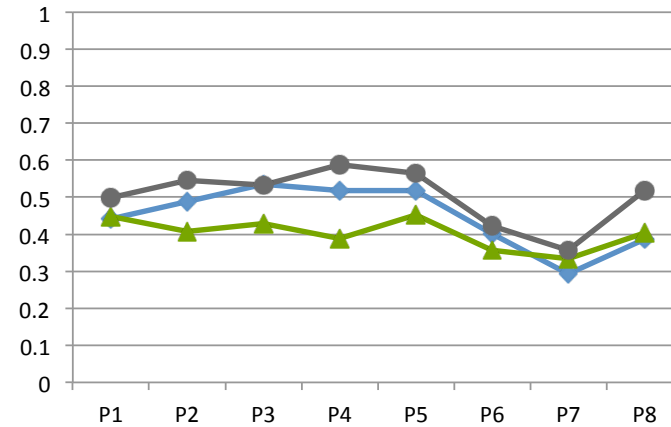

Supplement: MOESM2 [file 9465826]
